1 **Src activation in lipid rafts confers epithelial cells with invasive potential to escape from apical extrusion**  
2 **during cell competition**

3

4 Kentaro Kajiwara<sup>1\*</sup>, Ping-Kuan Chen<sup>1</sup>, Shunsuke Kon<sup>2</sup>, Yasuyuki Fujita<sup>3</sup>, and Masato Okada<sup>1\*</sup>

5

6 <sup>1</sup> Department of Oncogene Research, Research Institute for Microbial Diseases, Osaka University, Osaka, Japan

7 <sup>2</sup> Division of Development and Aging, Research Institute for Biomedical Sciences, Tokyo University of Science,  
8 Chiba, Japan

9 <sup>3</sup> Department of Molecular Oncology, Kyoto University Medical School, Kyoto, Japan

10

11

12 \* Corresponding author

13 Mailing address: Department of Oncogene Research, Research Institute for Microbial Diseases, Osaka  
14 University, Yamada-Oka 3-1, Suita 565-0871, Japan

15 Phone: 81-6-8299-8299

16 FAX: 81-6-6879-8298

17 E-mail: [kajiwara@biken.osaka-u.ac.jp](mailto:kajiwara@biken.osaka-u.ac.jp), [okadam@biken.osaka-u.ac.jp](mailto:okadam@biken.osaka-u.ac.jp)

18

## 19 **Abstract**

20 Abnormal/cancerous cells within healthy epithelial tissues undergo apical extrusion to protect against  
21 carcinogenesis, while they acquire invasive capacity once carcinogenesis progresses. However, the molecular  
22 mechanisms by which cancer cells escape from apical extrusion and invade surrounding tissues remain elusive.  
23 We found that during competition within epithelial cell layers, Src-transformed cells underwent basal  
24 delamination by Src activation within lipid rafts, whereas they were apically extruded when Src was outside of  
25 lipid rafts. Comparative analysis of contrasting phenotypes revealed that activation of the Src-STAT3-MMP  
26 axis through lipid rafts was required for basal delamination. CUB domain-containing protein 1 (CDCP1) was  
27 identified as an Src activating scaffold in lipid rafts, and its overexpression induced basal delamination. In renal  
28 cancer spheroids, CDCP1 promoted HGF-dependent invasion by activating the Src-STAT3-MMP axis. Overall,  
29 these results suggest that Src activation in lipid raft confers resistance to apical extrusion and invasive potential  
30 on epithelial cells to promote carcinogenesis.

31

## 32 **Introduction**

33 The normal epithelial cell layer is maintained through various phenomena including turnover of  
34 harmful and suboptimal cells for homeostasis in healthy tissues. Oncogene-transformed mammalian cells are  
35 forcibly eliminated from the epithelial cell layer without involving the immune system<sup>1-3</sup>. Emerging transformed  
36 cells in normal cell layer are extruded by the surrounding normal cells in a non-cell-autonomous fashion,  
37 resulting in the maintenance of a healthy cell layer<sup>4-7</sup>. This phenomenon, known as apical extrusion, is a mode  
38 of “cell competition”, and is considered a maintenance system for healthy tissues in the initial phase of  
39 carcinogenesis<sup>5, 8</sup>. During cancer progression, such defence systems may be abrogated or overwhelmed by  
40 additional changes in cancer cells. However, little is known regarding how cancer cells escape this safeguard,  
41 expand their own area, and invade the surrounding normal tissues.

42 An oncogene product Src, a membrane-anchored tyrosine kinase, plays a pivotal role in regulating  
43 various cellular functions including cell adhesion, migration, and invasion<sup>9</sup>. Src is overexpressed and/or  
44 activated in various malignant cancers implying a crucial role in cancer progression. However, Src-transformed  
45 cells are eliminated from normal epithelial tissues by cell competition in invertebrate models using zebrafish  
46 embryos and *Drosophila* tissues, as well as in mammalian models<sup>10-19</sup>. Thus, Src showed dual functions  
47 depending on the cellular conditions. Previous studies using Src-activated MDCK type II cells have identified  
48 several cell competition-related proteins<sup>3</sup>. Filamin and vimentin accumulate in normal cells at the interface with  
49 Src-transformed cells<sup>20</sup>, whereas EPLIN accumulates in transformed cells<sup>21</sup>. Similar cellular events are also  
50 observed in oncogenic Ras-transformed cells<sup>20, 21</sup>. Cytoskeletal remodelling may also contribute to the apical  
51 extrusion of transformed cells from normal tissues<sup>6, 12</sup>. However, the mechanisms by which cell competition-  
52 related functions of Src are switched to malignancy-inducing functions in cancer cells are largely unknown.

53 Upon activation, Src is translocated between the cytosolic space and intracellular membrane to

54 activate region-specific substrates<sup>9</sup>. Part of activated Src is translocated into sphingolipid/cholesterol-enriched  
55 lipid rafts through myristoylation to phosphorylate specific downstream signalling molecules<sup>22-24</sup>, indicating  
56 that Src function can be spatially regulated through association with lipid rafts. Src recruitment to lipid rafts is  
57 mediated by specific transmembrane scaffolds including Pag1/Cbp and CUB domain-containing protein 1  
58 (CDCP1)<sup>22, 25-28</sup>. CDCP1 has two palmitoylation sites required for raft localisation and an Src-binding motif in  
59 the cytoplasmic domain, enabling Src activation in lipid rafts. Furthermore, CDCP1 associates with the HGF  
60 receptor Met, to facilitate Src-mediated STAT3 activation, which promotes the expression of matrix  
61 metalloproteases (MMPs) involved in extracellular matrix (ECM) remodelling<sup>26</sup>. Thus, spatial regulation of  
62 activated Src is important for sorting specific signal transductions, leading to the onset of physiological and  
63 pathological functions.

64 In this study, to address the molecular mechanisms by which Src-transformed cells escape from  
65 apical extrusion to acquire malignant properties, we analysed the behaviour of two types Src-transformed  
66 MDCK cells. Comparative analysis of these cells revealed that activation of the Src-STAT3-MMP axis through  
67 lipid rafts is required for basal delamination. We also show that CDCP1 induces basal invasion by Src activation  
68 in MDCK cells, and upregulation of CDCP1 promotes HGF-dependent invasion of renal cancer cells. These  
69 findings suggest that spatial activation of Src signalling in lipid raft confers malignant potential on epithelial  
70 cells to promote carcinogenesis by escaping from apical extrusion. This is the first report demonstrating a  
71 molecular mechanism for cell fate switching during cell competition.

72

## 73 **Results**

### 74 **Src-transformed MDCK type I cells undergo basal delamination**

75 To investigate the effects of Src transformation on epithelial cell competition, we introduced an  
76 inducible Src (EGFP-tagged) expression system into MDCK type I cells (Src-EGFP cells). After doxycycline  
77 (Dox) treatment, active Src was overexpressed (p-Src blot, pTyr418) and phosphorylated various intracellular  
78 proteins (pY1000 blot) (**Fig. 1a**). A kinase-defective mutant (Src-KD-EGFP) was used as a negative control. To  
79 monitor the behaviour of Src-transformed cells under cell competition condition, Src-EGFP cells were co-  
80 cultured with normal cells on a two-dimensional collagen gel. Before Dox treatment, Src-EGFP cells remained  
81 in the cell layer; overexpression of Src-EGFP, but not Src-KD-EGFP, induced cell delamination into the basal  
82 side of the cell layer (**Fig. 1b**). These phenomena were quantified based on the criteria defined by the vertical  
83 location of cells in the cell layer (**Fig. 1c**). In contrast, when only Src-EGFP cells were cultured, delamination  
84 was not observed even after Dox treatment (**Fig. 1b**). Furthermore, the efficacy of delamination in Src-EGFP  
85 cells was dependent on the density of normal cells and Src activation levels (**Supplementary Fig. 1a-d**). These  
86 results indicate that Src-induced basal delamination requires surrounding normal cells, which is a typical feature  
87 of epithelial cell competition. We also found that Src-EGFP cells adopted a round shape and quickly moved  
88 toward the apical side in the early phase of Src induction (~12h), whereas they began to undergo delamination

89 from 18 h after induction (**Fig. 1d, e**). These findings indicate that Src activation in MDCK type I cells induces  
90 basal delamination in the context of cell competition through multiple processes.

91 However, our findings in MDCK type I cells were inconsistent with previous results obtained in  
92 other subtypes of MDCK type II cells<sup>12,20</sup>. When Src-EGFP cells were co-cultured with normal cells in a three-  
93 dimensional collagen matrix to form mosaic cysts, Src-expressing MDCK type I cells underwent basal  
94 delamination (**Supplementary Fig. 1e**), as observed in two-dimensional cultures. However, Src-expressing  
95 MDCK type II cells were apically extruded and accumulated in the cyst lumen, as described previously<sup>3,5</sup>. To  
96 examine whether induction of opposing phenotypes between MDCK type I and type II cells is unique to Src-  
97 transformed cells, we introduced oncogenic RasV12 in MDCK type I cells and performed a two-dimensional  
98 cell competition assay (**Supplementary Fig. 1f, g**). Consistent with previous studies in MDCK type II cells,  
99 RasV12-transformed cells were apically excluded even in MDCK type I cells. These results suggest that basal  
100 delamination is a unique feature of Src-transformed MDCK type I cells, and that comparative analysis between  
101 the two types of cells may provide mechanistic insights into the cell competition specifically induced by Src  
102 transformation.

#### 103 104 **Focal adhesions are matured in Src-transformed MDCK type I cells**

105 To address the mechanisms by which Src activation induces basal delamination in MDCK type I  
106 cells, we first examined the accumulation of an apical extrusion marker, EPLIN, identified in MDCK type II  
107 cells<sup>21</sup>. Immunofluorescence analysis revealed that EPLIN, a cytoskeleton-associated protein, was also  
108 accumulated in Src-transformed MDCK type I cells (**Supplementary Fig. 2a**), indicating that Src-induced basal  
109 delamination of MDCK type I cells shares some mechanisms observed in type II cells. Next, we observed the  
110 cellular events in Src-transformed cells undergoing basal delamination. Immunofluorescence indicated that  
111 activated Src was concentrated in focal adhesions facing the basement membrane, where phosphorylated FAK,  
112 filamentous actin, cortactin, and paxillin were also concentrated (**Supplementary Fig. 2b**). FAK inhibition by  
113 a specific inhibitor or by overexpression of dominant-negative FAK (FAK-DN) significantly attenuated Src-  
114 induced basal delamination (**Supplementary Fig. 2c, d**), indicating that Src-transformed cells delaminate  
115 through focal adhesion maturation. Furthermore, analysis using DQ-conjugated collagen, which can monitor  
116 the degradation of collagen matrix, revealed that Src-transformed delaminating cells have strong matrix  
117 degradation activity (**Supplementary Fig. 2e**). These results indicate that Src transformation promotes  
118 maturation of focal adhesions and delamination into the basement membrane through degradation of the  
119 extracellular matrix, suggesting that Src-transformed MDCK type I cells acquire invasive potential to escape  
120 apical extrusion.

#### 121 122 **Lipid raft localisation is crucial for Src-induced basal delamination**

123 To further identify the components required for Src-induced basal delamination, we performed

124 inhibitor screening (**Supplementary Table 1**). Pretreatment with lipid metabolism inhibitors targeting the  
125 biosynthesis of sphingolipid, glycosphingolipid, fatty acids, and cholesterol, suppressed Src-induced basal  
126 delamination (**Fig. 2a**). These inhibitors suppress lipid synthesis and metabolism, leading to altered integrity of  
127 lipid rafts. As activated Src is translocated and concentrated into lipid rafts, Src distribution to lipid rafts may  
128 be involved in regulating Src-induced basal delamination. Indeed, activated Src was concentrated at the plasma  
129 membrane, where the lipid raft-component, flotillin1, was concentrated (**Fig. 2b**). Cholesterol levels in  
130 detergent-resistant membrane (DRM) fractions containing lipid raft components were gradually increased after  
131 Src overexpression (**Fig. 2c**). Furthermore, membrane cholesterol depletion by pretreatment with M $\beta$ CD  
132 suppressed the basal delamination of Src-transformed cells, though some of cells were apically extruded (**Fig.**  
133 **2a, d**). Comparative analysis of lipid raft Src localisation between MDCK type I and II cells showed that  
134 activated Src was immediately translocated into the DRM fractions in MDCK type I cells, whereas Src  
135 translocation proceeded significantly more slowly in MDCK type II cells than in type I cells (**Fig. 2e, f**). These  
136 results suggest that lipid raft Src localisation is involved in the induction of basal delamination.

137 To verify this possibility, we forcibly localised Src in either lipid rafts or non-lipid rafts using a  
138 rapamycin-inducible FKBP-FRB dimerisation system (**Fig. 3a and Supplementary Fig. 3a**). Before analysis,  
139 we confirmed that rapamycin treatment did not affect Src-induced delamination (**Supplementary Fig. 3b, c**).  
140 DRM separation analysis showed that rapamycin treatment induced Src translocation into lipid rafts in cells  
141 expressing Pag1<sup>TM</sup>-FKBP, but not Pag1<sup>TM<sup>mut</sup></sup>-FKBP (**Fig. 3b**). In a two-dimensional cell competition assay,  
142 Src trapped in lipid rafts promoted basal delamination (**Fig. 3c, d and Supplementary Fig. 3d**), in a manner  
143 similar to Src-EGFP overexpression. In contrast, Src trapped outside lipid rafts induced apical extrusion (**Fig.**  
144 **3c, d and Supplementary Fig. 3d**). Similar phenomena were observed in the three-dimensional culture of  
145 mosaic cysts (**Fig. 3e, f**). Importantly, when this system was introduced in MDCK type II cells, forced  
146 localisation of Src into lipid rafts conferred the ability of basal delamination to Src-expressing cells  
147 (**Supplementary Fig. 3e**). These data support our hypothesis that lipid raft localisation of activated Src is crucial  
148 for inducing basal delamination.

## 149

### 150 **The STAT3-MMP axis is crucial for Src-induced basal delamination**

151 To determine the downstream pathways of Src activation in lipid rafts, we performed an inhibitor  
152 screening assay using Src-EGFP-expressing MDCK type I cells. In the cell competition assay, we found that  
153 pretreatment with specific STAT3 inhibitors significantly suppressed Src-induced basal delamination (**Fig. 4a**).  
154 The same result was obtained when dominant-negative STAT3 (STAT3-DN) was overexpressed (**Fig. 4b**).  
155 STAT3 was activated (p-STAT3, pTyr705) by Src expression, but not by Ras (**Fig. 1a**), and this activation was  
156 elevated under competitive conditions (**Fig. 4c, d**). Comparative analysis of MDCK type I and II cells showed  
157 that STAT3 was markedly activated by Src expression in MDCK type I cells, whereas STAT3 activation was  
158 significantly lower in type II cells than in type I cells, even though intracellular tyrosine phosphorylation levels

159 (pY1000 blot) were almost comparable (**Fig. 4e, f**). These results suggest that selective STAT3 activation via  
160 Src in lipid rafts is tightly linked with Src-induced basal delamination.

161 STAT3 activated by lipid raft Src has been reported to upregulates MMP expressions<sup>26</sup>. Accordingly,  
162 we analysed the contribution of MMPs to Src-induced basal delamination. Src-induced basal delamination was  
163 suppressed by pretreatment with broad-spectrum MMP inhibitors (**Fig. 4a**), indicating that the Src-transformed  
164 cells delaminate into basement membrane through MMP-mediated collagen matrix degradation  
165 (**Supplementary Fig. 2e**). We then investigated the expression of MMPs in MDCK type I and II cells. After  
166 Src induction, a broad range of MMPs including both secreted- (MMP3, MMP11) and membrane-type (MMP14  
167 and MMP17), were significantly upregulated in MDCK type I cells, whereas the levels of MMP upregulation  
168 were substantially lower in MDCK type II cells (**Supplementary Fig. 4a**). Further, upregulation of MMP14  
169 and MMP17 was suppressed by pretreatment with the STAT3 inhibitor, S3i-201 (**Supplementary Fig. 4b**),  
170 indicating that the expression of MMP genes is upregulated by STAT3 activation. Immunofluorescence also  
171 showed that MT4-MMP, a gene product of MMP17, was upregulated and accumulated in the focal adhesions  
172 of Src-expressing cells in a two-dimensional cell competition assay (**Supplementary Fig. 4c**). These  
173 observations demonstrate that Src activation in lipid rafts induces STAT3 activation, followed by upregulation  
174 of MMPs required for basal delamination.

#### 175 176 **CDCP1 induces basal delamination by recruiting Src in lipid rafts**

177 We next considered how Src is selectively localised to lipid rafts in MDCK type I cells. In the two  
178 MDCK cell types, there was no significant difference in the cholesterol contents (**Fig. 2c**) and expression levels  
179 of lipid raft marker proteins, flotillin and caveolin, in the DRM fractions (**Fig. 2e and Supplementary Table**  
180 **2**). These results indicate that lipid rafts structures are seemingly comparable between these two cell types,  
181 suggesting that differences in the lipid raft Src localisation may arise due to differences in scaffold proteins that  
182 recruit Src to the lipid rafts. To identify the Src scaffold protein(s) in lipid rafts, we isolated DRM fractions from  
183 Src-inducible MDCK type I and II cells and analysed their protein contents by mass spectrometry  
184 (**Supplementary Fig. 5a**). After Src overexpression, the accumulated protein in DRM fractions was higher in  
185 MDCK type I cells than in type II cells (**Supplementary Fig. 5a and Supplementary Table 3**). Among 105  
186 proteins enriched in the DRM fractions from MDCK type I cells, we chose CDCP1 and Met as potential Src  
187 scaffold protein candidates in lipid rafts (**Supplementary Fig. 5a and Supplementary Table 3**) and analysed  
188 their functions.

189 Previous studies have already shown that CDCP1 is associated with activated Src in lipid rafts (**Fig.**  
190 **5a**)<sup>26</sup>. Under cell competition conditions, we found that CDCP1 accumulated in the plasma membrane of Src-  
191 expressing cells, suggesting that CDCP1 contributes to Src regulation in the context of cell competition  
192 (**Supplementary Fig. 5b**). We thus examined the role of CDCP1 in CDCP1-inducible MDCK type I cells. In  
193 the cell competition assay, overexpression of wild-type CDCP1 induced a morphological change to a stretched



194 shape and delamination into the basement membrane (**Fig. 5a-c**). Overexpression of the CDCP1-Y734F mutant  
195 (CDCP1-YF), which has a mutation in the Src-association site, showed no obvious effects (**Fig. 5a-c**). In  
196 contrast, overexpression of the CDCP1-C689G-C690G mutant (CDCP1-CG), which has mutations in the  
197 palmitoylation sites required for lipid raft localisation, induced apical extrusion (**Fig. 5a-c**). Similar phenomena  
198 were observed in the three-dimensional cell competition assay (**Fig. 5d, e**). These data demonstrate that CDCP1  
199 functions as an activating scaffold for endogenous Src in lipid rafts and support our model that lipid raft  
200 localisation of activated Src induces basal delamination instead of apical extrusion.

201 On the contrary, although Met inhibitors suppressed Src-induced basal delamination  
202 (**Supplementary Fig. 5c**), overexpression of Met alone did not induce endogenous Src activation or basal  
203 delamination (**Supplementary Fig. 5d-f**), indicating that Met activity is required but not sufficient for cell  
204 delamination. The lipid raft-localised CDCP1-Src complex associates with Met for activating the STAT3  
205 pathway, and an efficient interaction of CDCP1-Met is known to require proteolytic shedding of CDCP1  
206 extracellular domain<sup>26</sup>. To examine whether the CDCP1-Met-STAT3 axis is functional even in the context of  
207 cell competition, we introduced K365A-R368A-K369A mutations in CDCP1 (CDCP1-PR) to repress  
208 proteolytic shedding and interaction with Met and STAT3 activation (**Fig. 5a**). In both two- and three-  
209 dimensional cell competition, overexpression of CDCP1-PR induced apical extrusion (**Fig. 5b-e**). Further,  
210 CDCP1-induced basal delamination was significantly suppressed by pretreatment with specific inhibitors of  
211 Met, STAT3, and MMPs, and a part of the CDCP1-overexpressing cells were extruded into the apical side in  
212 two- and three-dimensional cell competition assays (**Supplementary Fig. 5g, h**). These data suggest that Src-  
213 induced basal delamination is spatially controlled by CDCP1 through association with Met, followed by  
214 activation of the STAT3-MMPs axis via lipid rafts (**Supplementary Fig. 5i**).

215

### 216 **Activation of the CDCP1-STAT3-MMPs axis induces invasion ability in renal cancer cells**

217 In the three-dimensional cell competition assay, CDCP1-overexpressing MDCK type I cells  
218 protruded from the cell layer of cysts and migrated into the ECM along with normal cells (**Fig. 5d**). As these  
219 phenotypes appear quite similar to cancer invasion, we assessed the role of the CDCP1-Src complex in cancer  
220 cells using spheroid cultures of the renal cancer cell line A498, in which CDCP1 was highly expressed and was  
221 further upregulated by HGF treatment (**Supplementary Fig. 6a-c**). CDCP1 knockdown attenuated Met  
222 expression and partially suppressed the activation of HGF signalling components, including Src family kinases  
223 (SFKs), STAT3, and MMP expression (**Supplementary Fig. 6a, b, d**). Furthermore, CDCP1 knockdown  
224 suppressed HGF-induced morphological changes accompanied with N-cadherin upregulation, a marker of  
225 epithelial-mesenchymal transition (EMT), resulting in the inhibition of *in vitro* invasion activity  
226 (**Supplementary Fig. 6c, e**). These data suggest that CDCP1 supports activation of HGF-Met signalling, which  
227 induces EMT-mediated invasive phenotypes by activating the Src-STAT3-MMPs axis, even in cancer cells.

228 To further elucidate the role of CDCP1 upregulation in heterogeneous cancer cell populations,

229 parental A498 (CDCP1<sup>High</sup>; CMFDA-stained) cells were mixed with CDCP1-knockdown A498 (CDCP1<sup>Low</sup>;  
230 unstained) cells, and the mosaic spheroids were cultured in a collagen matrix (**Fig. 6a**). After HGF stimulation,  
231 CDCP1<sup>High</sup> cells, but not CDCP1<sup>Low</sup> cells, protruded from the spheroids and migrated into the collagen matrix  
232 (**Fig. 6b, c**). Furthermore, some CDCP1<sup>High</sup> cells co-migrated together with a mass of CDCP1<sup>Low</sup> cells (**Fig. 6b**),  
233 implying that highly invasive CDCP1<sup>High</sup> cells function as tip cells and lead collective cell invasion. To confirm  
234 the molecular mechanism downstream of CDCP1, we re-expressed CDCP1 or its mutants in CDCP1<sup>Low</sup> cells.  
235 The defect in HGF-induced invasion was recovered by re-expression of wild-type CDCP1, but not the CDCP1-  
236 YF mutant, and was partially recovered by re-expression of CDCP1-CG mutants (**Fig. 6d, e**). Additionally, the  
237 HGF-induced invasive phenotype of CDCP1<sup>High</sup> cells was suppressed by pretreatment with inhibitors of SFKs,  
238 STAT3, MMPs, and cholesterol synthesis (**Fig. 6f, g**). These observations suggest that upregulated CDCP1  
239 promotes HGF-induced collective invasion of cancer cells via activation of the Src-STAT3-MMPs axis through  
240 the lipid raft signalling platform.

241

## 242 Discussion

243 In this study, we demonstrated that spatial regulation of Src within the plasma membrane is crucial  
244 for cell fate decisions under cell competition status. In the cell competition assay, Src-transformed MDCK type  
245 II cells were apically extruded, whereas Src-transformed type I cells underwent basal delamination.  
246 Comparative analysis of these two cell types revealed that Src localisation in lipid rafts is a critical determinant  
247 of basal delamination through activation of the STAT3-MMP axis and maturation of focal adhesions  
248 (**Supplementary Fig. 5j**). Furthermore, we showed that lipid raft localisation of Src is mediated by the  
249 transmembrane scaffold, CDCP1, and that cancer cells with CDCP1-Src upregulation behave as leader cells to  
250 promote collective cancer invasion in heterogeneous populations. These findings suggest that upregulation of  
251 Src activity via lipid raft scaffolds such as CDCP1, may facilitate escape from apical extrusions by inducing  
252 invasive potential, leading to promotion of cancer malignancy.

253 As Src has a strong oncogenic potential, Src protein expression and/or activity is strictly regulated  
254 via phosphorylation by Csk<sup>29</sup>, the ubiquitin-proteasome system, and exosomal exclusion<sup>30</sup>. Additionally,  
255 intracellular distribution of Src contributes to regulate its function. Src is anchored to the membrane via  
256 myristoylation. Upon activation, part of Src is translocated into lipid rafts via scaffold proteins, such as the  
257 negative regulator Pag1/Cbp<sup>22, 25</sup> and positive regulator CDCP1<sup>28</sup>, and is inactivated or activated on scaffold  
258 proteins, depending on the cellular context. In this study, we found that activated Src efficiently accumulated in  
259 lipid rafts to activate the STAT3 pathway in MDCK type I cells, whereas Src accumulation in lipid rafts was  
260 substantially attenuated in MDCK type II cells. This difference was tightly associated with differential  
261 phenotypes in cell competition, basal delamination in type I cells, and apical extrusion in type II cells. There  
262 are two potential explanations for this difference. First, differential phenotypes may arise due to differences in  
263 the compositions of lipid rafts, consisting mainly of cholesterol and sphingolipids. Although there were no



264 significant differences in cholesterol content between the two cell lines, differences in sphingolipid content may  
265 influence lipid raft integrity and retention of activated Src<sup>23</sup>. Indeed, differences in sphingolipid species between  
266 the two cell lines have been reported previously<sup>31</sup>. Furthermore, sphingolipids and cholesterol metabolism is  
267 disordered in various cancers and is associated with the promotion of cancer malignancy<sup>32-34</sup>. In a cell  
268 competition mouse model, apical extrusion of Ras-transformed cells from epithelial tissues was suppressed by  
269 obesity<sup>8</sup>. These lines of evidence suggest that alterations in lipid metabolism may also allow abnormal/mutated  
270 cells to escape apical extrusion in the initial phase of carcinogenesis.

271 Another potential cause for inducing differential phenotypes between MDCK type I and II cells is  
272 the differential content of Src scaffolds in lipid rafts. In this study, we revealed that CDCP1 plays an important  
273 role as an Src scaffold in lipid rafts to control cell fate in the context of cell competition. Overexpressed CDCP1  
274 recruited activates Src into lipid rafts, followed by activation of the STAT3-MMP axis through association with  
275 Met<sup>26</sup>. However, Src relocation was not completely suppressed by CDCP1 knockout (data not shown),  
276 suggesting that an additional Src scaffold(s) exists in lipid rafts. Among the DRM-enriched proteins identified  
277 from MDCK type I cells, EphA2 (**Supplementary Table 3**), a receptor tyrosine kinase that is associated with  
278 Src<sup>35</sup> and contributes to cancer cell invasion<sup>36</sup>, is another strong candidate. In a cell competition assay with Ras-  
279 transformed cells, EphA2 is involved in regulating Src and its downstream signalling<sup>37</sup>. These observations  
280 imply that EphA2 may function cooperatively with CDCP1 to induce basal delamination in MDCK type I cells.

281 Upregulation of CDCP1 is frequently observed in accordance with cancer development<sup>26, 27, 38</sup>.  
282 CDCP1 was highly expressed in patients with renal cancer in The Cancer Genome Atlas (TCGA) cohort  
283 (**Supplementary Fig. 7a**), and high expression of CDCP1 was correlated with poor prognosis (**Supplementary**  
284 **Fig. 7b**). The STAT3 pathway is also activated in various cancers to promote cancer malignancy<sup>39</sup>. In this study,  
285 we further found that expression of MMP14/MT1-MMP and MMP17/MT4-MMP was increased by STAT3  
286 activation in MDCK cells. Both MMPs are expressed in A498 renal cancer cells and may be involved in cancer  
287 metastasis. MMP14 is involved in cell extrusion of transformed cells from the normal epithelial layer<sup>40</sup>. MMP17  
288 is a GPI-anchored membrane-type MMP involved in cell invasion<sup>41, 42</sup> and is upregulated in various cancers  
289 including breast, gastric, and colon cancer<sup>43, 44</sup>. MMP17 was also highly expressed in renal cancer in the TCGA  
290 dataset, and its expression was elevated during cancer progression (**Supplementary Fig. 7c**). Furthermore, high  
291 MMP17 expression was associated with poor prognosis in patients with renal cancer (**Supplementary Fig. 7d**).  
292 These data suggest that MMP17 is an important factor in the malignant progression of renal cancer.

293 In summary, comparative analysis of contrasting phenotypes in Src-activated MDCK cells revealed  
294 that activated Src in lipid rafts facilitates cellular escape apical extrusions by inducing invasive potential in  
295 epithelial cells. Further analysis in cancer cells also showed that Src activation by upregulation of lipid raft  
296 scaffolds promoted invasive activity during cancer development. Based on these findings, we propose that the  
297 regulatory system of Src distribution in lipid rafts, such as raft scaffold proteins and lipid contents, may provide  
298 promising therapeutic targets to control carcinogenesis and cancer progression.

299

## 300 **Materials and methods**

301

### 302 **Cell and cell culture**

303 Two types of MDCK and A498 cells were cultured in Dulbecco's modified Eagle's medium (DMEM)  
304 supplemented with 10% fetal bovine serum (FBS) at 37°C in a 5% CO<sub>2</sub> atmosphere. MDCK type II cells were  
305 gifted from Dr. Fujita<sup>12</sup>. Recombinant HGF (100-39) was purchased from PeptoTech.

306

### 307 **Plasmid construction and gene transfer**

308 Inducible gene expression system based on Tet-On 3G (Clontech) was employed. Mouse Src and human CDCP1  
309 were fused at 5' terminus of EGFP (or EBFP) and introduced into pRetroX-TRE3G plasmid. Src-KD was  
310 generated by point mutation of K297M by mutagenesis PCR. CDCP1 mutants were generated by point  
311 mutations of Y734F, C689G-C690G, or K365A-R368A-K369A by mutagenesis PCR. Human Met and  
312 HRASV12 were introduced into pRetroX-TRE3G plasmid. For construction of plasmids for FKBP-FRB  
313 dimerization (**Supplementary Figure 3a**), transmembrane domain (63 residues of N-terminus) of mouse  
314 Pag1/Cbp was amplified, and point mutations (C39G-C42G; Pag1<sup>TM<sup>mut</sup></sup>) were generated by mutagenesis PCR.  
315 The Pag1<sup>TM</sup> or Pag1<sup>TM<sup>mut</sup></sup> DNA fragments were fused to 5' terminus of human FKBP12 and introduced into  
316 pCX4 plasmid. FRB domain (2021-2113 residues) of human MTOR was amplified, and the FRB domain was  
317 fused with 5' terminus of cytosolic Src-EGFP (Src-G2A-EGFP) and introduced into pRetroX-TRE3G plasmid.  
318 To construct mCherry-CAAX plasmid, CAAX motif (21 residues of C-terminus) of human KRAS was  
319 amplified, and the DNA fragment was fused to 3' terminus of mCherry and introduced into pCX4 plasmid.  
320 FAK-DN and STAT3-DN were generated by point mutation of Y397F and Y705F, respectively, by mutagenesis  
321 PCR. Construction of pCX4-STAT3-MER plasmid was described in previous report<sup>26</sup>. Gene transfer of  
322 pRetroX-TRE3G and pCX4 was carried out by retroviral infection. Retroviral production and infection were  
323 performed as described previously<sup>45</sup>.

324 shRNAs against human CDCP1 (TRCN0000134829 and TRCN0000137203, Sigma-Aldrich) and MMP17  
325 (TRCN0000049976 and TRCN0000049977, Sigma-Aldrich) were introduced in to cells through lentiviral  
326 infection using packaging mix (Sigma-Aldrich).

327

### 328 **Cell competition analysis**

329 For two-dimensional competition assay, wild-type and gene expression inducible system harbouring MDCK  
330 cells were mixed at a ratio of 35:1 and spread on collagen sheet using Cellmatrix type I-A (Nitta Gelatin) in  
331 DMEM supplemented with 10% FBS. Cell Tracker Green CMFDA (C7025, Thermo Fisher Scientific) was used  
332 for labelling before expression of fluorescent protein. For collagen degradation assay, a collagen sheet  
333 containing 2% DQ-collagen type I (D12060, Thermo Fisher Scientific) was used. After MDCK sheet formation,  
334 cells were incubated in DMEM supplemented with 5% FBS and 1 µg/ml doxycycline (Dox).

335 For three-dimensional competition assay, wild-type and gene expression inducible system harbouring cells were  
336 mixed at a ratio of 8:1 and cultured in low-attachment dish (Sumitomo Bakelite) for 2 days. Mosaic spheroids  
337 were harvested and recultured on Matrigel (356231, Corning) for 3 days. After cystogenesis, collagen type I  
338 matrix was overlaid and incubated in DMEM supplemented with 5% FBS and 1 µg/ml Dox for 2 days.

339

#### 340 **Mosaic spheroid analysis**

341 A498 cells harbouring shControl were labelled with CMFDA and mixed with A498 cells harbouring shCDCP1  
342 at a ratio of 1:10 (**Figure 6a**). Mixed cells were cultured in low cell adhesion dish for 2 days. Mosaic spheroids  
343 were harvested and recultured in collagen type I matrix in the presence of 50 ng/ml HGF for 2 days.

344

#### 345 **Immunoblotting analysis**

346 Cell were lysed in n-octyl-b-D-glucoside (ODG) buffer [20 mM Tris-HCl (pH7.4), 150 mM NaCl, 1 mM EDTA,  
347 1 mM Na<sub>3</sub>VO<sub>4</sub>, 20 mM NaF, 1% Nonidet P-40, 5% glycerol, 2% ODG and protease inhibitor cocktail (Nacalai  
348 Tesque)], and immunoblotting was performed using primary antibodies listed below. All blots were visualized  
349 and quantified using a LuminoGraph II (Atto).

350

#### 351 **Immunofluorescent microscopic analysis**

352 MDCK cells, cysts and A498 spheroids were fixed with 4% paraformaldehyde (PFA) and blocked with 1% BSA.  
353 Fixed MDCK cells were incubated with primary antibodies listed below and then incubated further with Alexa  
354 Fluor 488-conjugated antibody (Thermo Fisher Scientific). Fixed A498 cells were incubated with Alexa Fluor  
355 594-conjugated phalloidin (Thermo Fisher Scientific). Immunostained cells were observed using a FV1000  
356 confocal fluorescence microscope system (Olympus).

357

#### 358 **Antibodies and inhibitors**

359 The following primary antibodies were used in this study: anti-STAT3 (9132), anti-STAT3 pY705 (9145), anti-  
360 phospho-tyrosine pY1000 (8954), anti-Met (3127, clone 25H2) and anti-Met pY1234/1235 (3077) were  
361 purchased from Cell Signaling Technologies. Anti-GAPDH (sc-32233, clone 6C5), anti-FAK pY576/577 (sc-  
362 21831), anti-SFK (sc-18, clone SRC2), and anti-EPLIN (sc-136399, clone 20) were purchased from Santa Cruz  
363 Biotechnology. Anti-flotillin1 (610821), anti-caveolin1 (610407), and anti-paxillin (610051) were purchased  
364 from BD bioscience. Anti-Ras (OP01, clone Y13-259) and anti-cortactin (05-180, clone 4F11) were purchased  
365 from Millipore. Anti-Src pY418 (44-655G) and anti-GFP (A6455) were purchased from Thermo Fisher  
366 Scientific. Anti-FKBP12 (ab2918) and anti-MT4-MMP (ab51075) were purchased from abcam. Anti-CDCP1  
367 (LS-C172540, clone 5B3) was purchased from LSBio. Anti-HIF-1α (NB100-105) was purchased from Novas  
368 Biologicals.

369 The following inhibitors were used in this study: Fumonisin B1 (344850), S3i-201 (573102), stattic (573099),

370 and AMG-1 (448104) were purchased from Calbiochem. FAK inhibitor 14 (SML0837), marimastat (M2699),  
371 myriocin (M1177), and simvastatin (S6196) were purchased from Sigma-Aldrich. D-threo-1-phenyl-2-  
372 decanoylamino-3-morpholino-1-propanol (1756) was purchased from Matreya. Lovastatin (438185) was  
373 purchased from Millipore. Dasatinib (BMS-354825, 1586-100) was purchased from BioVision. Saracatinib  
374 (AZD0530, S1006) was purchased from Selleck. Rapamycin (30037-94) was purchased from Nacalai Tesque.  
375 Other inhibitors were obtained from the Screening Committee of Anticancer Drugs.

376

### 377 **DRM separation analysis**

378 Cells were lysed with homogenization buffer [50 mM Tris-HCl (pH7.4), 150 mM NaCl, 1 mM EDTA, 1 mM  
379 Na<sub>3</sub>VO<sub>4</sub>, 20 mM NaF, 0.25% Triton X-100 and protease inhibitor cocktail (Nacalai Tesque)] and separated on  
380 a discontinuous sucrose gradient (5-35-40%) by ultracentrifugation at 150,000 g using Optima L-100XP  
381 (Bechman Coulter). A total of 11 fractions were collected from the top of the sucrose gradient.

382

### 383 **Cholesterol analysis**

384 Cholesterol amount was analysed using the Amplex Red Cholesterol Assay Kit (A12216, Thermo Fisher  
385 Scientific) according to the manufacturer's protocol. The assay was performed to cell lysates from DRM  
386 fractions that were normalized for protein concentration.

387

### 388 **Quantitative real-time PCR analysis**

389 Total RNA from cells was prepared using Sepasol-RNA I Super G (Nacalai Tesque) and cDNA was prepared  
390 with the ReverTra Ace qPCR RT Master Mix (FSQ-201, Toyobo). Real-time PCR was performed on a  
391 QuatStudio 5 (Thermo Fisher Scientific) using Thunderbird SYBR qPCR Mix (QPS-201, Toyobo). The  
392 expression of the housekeeping gene GAPDH was used to normalized the amount of total RNA. The primers  
393 used in this study are listed in Supplementary Table 4.

394

### 395 **Clinical and gene expression analysis**

396 Clinical and RNA-seq data of renal clear cell carcinoma (606 patients) from the TCGA dataset were used.  
397 Survival curves were constructed using Kaplan-Meier method and compared by using the log-rank test.

398

### 399 **In vitro invasion assay**

400 Matrigel invasion chambers (354480, Corning) were used for the invasion assays.  $1 \times 10^5$  cells were seeded on  
401 chambers containing culture media with or without 100 ng/ml HGF. After incubation at 37°C for 24 h, invaded  
402 cells were fixed with 4% PFA and then stained with 1% crystal violet. Invaded cells were counted on  
403 micrographs; in each experiment, cells were counted on five randomly chosen fields.

404

405 **Statistics and reproducibility**

406 For data analysis, unpaired two-tailed *t*-test were performed to determine the *P*-values. For multiple group  
407 comparisons, two-way analysis of variance (ANOVA) was used. A *P*-value of < 0.05 was considered to reflect  
408 a statistically significant difference. All data and statistics were derived from at least three independent  
409 experiments.

410

411

412 **Acknowledgments**

413 We thank Dr. Kajita for experimental support and Dr. Saito for mass spectrometry analysis. The inhibitor kit  
414 was provided by the Screening Committee of Anticancer Drugs, which is supported by Grant-in-Aid for  
415 Scientific Research on Innovative Areas, Scientific Support Programs for Cancer Research, from The Ministry  
416 of Education, Culture, Sports, Science and Technology of Japan. This work was supported by a Grant-in-Aid  
417 for Scientific Research (C) (19K07639, to K.K.) and Grant-in-Aid for Scientific Research on Innovative Areas  
418 (26114001, to M.O.) from The Japan Society for the Promotion of Science.

419

420 **Competing interests**

421 The authors declare that they have no conflict of interest.

422

423 **Author contributions**

424 K.K. designed study and performed most experiments and data analysis. P.C. conducted experiments using  
425 CDCP1. S.K and Y.F. supported experiments. K.K. and M.O. wrote the manuscript with input from all authors.

426

427 **References**

- 428 1. Vishwakarma, M. & Piddini, E. Outcompeting cancer. *Nat Rev Cancer* **20**, 187-198 (2020).
- 429 2. Tanimura, N. & Fujita, Y. Epithelial defense against cancer (EDAC). *Semin Cancer Biol* **63**,  
430 44-48 (2020).
- 431 3. Kon, S. & Fujita, Y. Cell competition-induced apical elimination of transformed cells, EDAC,  
432 orchestrates the cellular homeostasis. *Dev Biol* (2021).
- 433 4. Watanabe, H. *et al.* Mutant p53-Expressing Cells Undergo Necroptosis via Cell Competition  
434 with the Neighboring Normal Epithelial Cells. *Cell Rep* **23**, 3721-3729 (2018).
- 435 5. Kon, S. *et al.* Cell competition with normal epithelial cells promotes apical extrusion of  
436 transformed cells through metabolic changes. *Nat Cell Biol* **19**, 530-541 (2017).
- 437 6. Hogan, C. *et al.* Characterization of the interface between normal and transformed epithelial  
438 cells. *Nat Cell Biol* **11**, 460-467 (2009).
- 439 7. Takeuchi, Y. *et al.* Calcium Wave Promotes Cell Extrusion. *Curr Biol* **30**, 670-681 e676 (2020).
- 440 8. Sasaki, A. *et al.* Obesity Suppresses Cell-Competition-Mediated Apical Elimination of  
441 RasV12-Transformed Cells from Epithelial Tissues. *Cell Rep* **23**, 974-982 (2018).
- 442 9. Yeatman, T.J. A renaissance for SRC. *Nat Rev Cancer* **4**, 470-480 (2004).
- 443 10. Enomoto, M. & Igaki, T. Src controls tumorigenesis via JNK-dependent regulation of the  
444 Hippo pathway in *Drosophila*. *EMBO Rep* **14**, 65-72 (2013).
- 445 11. Vidal, M., Larson, D.E. & Cagan, R.L. Csk-deficient boundary cells are eliminated from  
446 normal *Drosophila* epithelia by exclusion, migration, and apoptosis. *Dev Cell* **10**, 33-44 (2006).
- 447 12. Kajita, M. *et al.* Interaction with surrounding normal epithelial cells influences signalling  
448 pathways and behaviour of Src-transformed cells. *J Cell Sci* **123**, 171-180 (2010).
- 449 13. Moitrier, S. *et al.* Local light-activation of the Src oncoprotein in an epithelial monolayer  
450 promotes collective extrusion. *Communications Physics* **2** (2019).
- 451 14. Sato, N. *et al.* The COX-2/PGE2 pathway suppresses apical elimination of RasV12-  
452 transformed cells from epithelia. *Commun Biol* **3**, 132 (2020).
- 453 15. Takagi, M. *et al.* Accumulation of the myosin-II-spectrin complex plays a positive role in apical  
454 extrusion of Src-transformed epithelial cells. *Genes Cells* **23**, 974-981 (2018).
- 455 16. Kadeer, A. *et al.* Plectin is a novel regulator for apical extrusion of RasV12-transformed cells.  
456 *Sci Rep* **7**, 44328 (2017).
- 457 17. Teo, J.L. *et al.* Caveolae Control Contractile Tension for Epithelia to Eliminate Tumor Cells.  
458 *Dev Cell* **54**, 75-91 e77 (2020).
- 459 18. Anton, K.A., Kajita, M., Narumi, R., Fujita, Y. & Tada, M. Src-transformed cells hijack mitosis  
460 to extrude from the epithelium. *Nat Commun* **9**, 4695 (2018).
- 461 19. Chiba, T. *et al.* MDCK cells expressing constitutively active Yes-associated protein (YAP)



- 462 undergo apical extrusion depending on neighboring cell status. *Sci Rep* **6**, 28383 (2016).
- 463 20. Kajita, M. *et al.* Filamin acts as a key regulator in epithelial defence against transformed cells.  
464 *Nat Commun* **5**, 4428 (2014).
- 465 21. Ohoka, A. *et al.* EPLIN is a crucial regulator for extrusion of RasV12-transformed cells. *J Cell*  
466 *Sci* **128**, 781-789 (2015).
- 467 22. Oneyama, C. *et al.* The lipid raft-anchored adaptor protein Cbp controls the oncogenic potential  
468 of c-Src. *Mol Cell* **30**, 426-436 (2008).
- 469 23. Kajiwara, K. *et al.* c-Src-induced activation of ceramide metabolism impairs membrane  
470 microdomains and promotes malignant progression by facilitating the translocation of c-Src to  
471 focal adhesions. *Biochem J* **458**, 81-93 (2014).
- 472 24. Saitou, T., Kajiwara, K., Oneyama, C., Suzuki, T. & Okada, M. Roles of raft-anchored adaptor  
473 Cbp/PAG1 in spatial regulation of c-Src kinase. *PLoS One* **9**, e93470 (2014).
- 474 25. Kawabuchi, M. *et al.* Transmembrane phosphoprotein Cbp regulates the activities of Src-  
475 family tyrosine kinases. *Nature* **404**, 999-1003 (2000).
- 476 26. Kajiwara, K. *et al.* CDCP1 promotes compensatory renal growth by integrating Src and Met  
477 signaling. *Life Sci Alliance* **4** (2021).
- 478 27. Uekita, T. & Sakai, R. Roles of CUB domain-containing protein 1 signaling in cancer invasion  
479 and metastasis. *Cancer Sci* **102**, 1943-1948 (2011).
- 480 28. Khan, T., Kryza, T., Lyons, N.J., He, Y. & Hooper, J.D. The CDCP1 Signaling Hub: A Target  
481 for Cancer Detection and Therapeutic Intervention. *Cancer Res* (2021).
- 482 29. Okada, M. Regulation of the SRC family kinases by Csk. *Int J Biol Sci* **8**, 1385-1397 (2012).
- 483 30. Tanaka, K., Ito, Y., Kajiwara, K., Nada, S. & Okada, M. Ubiquitination of Src promotes its  
484 secretion via small extracellular vesicles. *Biochem Biophys Res Commun* (2020).
- 485 31. Hansson, G.C., Simons, K. & van Meer, G. Two strains of the Madin-Darby canine kidney  
486 (MDCK) cell line have distinct glycosphingolipid compositions. *The EMBO Journal* **5**, 483-  
487 489 (1986).
- 488 32. Riscal, R., Skuli, N. & Simon, M.C. Even Cancer Cells Watch Their Cholesterol! *Mol Cell* **76**,  
489 220-231 (2019).
- 490 33. Kuzu, O.F., Noory, M.A. & Robertson, G.P. The Role of Cholesterol in Cancer. *Cancer Res* **76**,  
491 2063-2070 (2016).
- 492 34. Hannun, Y.A. & Obeid, L.M. Sphingolipids and their metabolism in physiology and disease.  
493 *Nat Rev Mol Cell Biol* **19**, 175-191 (2018).
- 494 35. Fang, W.B. *et al.* Overexpression of EPHA2 receptor destabilizes adherens junctions via a  
495 RhoA-dependent mechanism. *J Cell Sci* **121**, 358-368 (2008).
- 496 36. Dunne, P.D. *et al.* EphA2 Expression Is a Key Driver of Migration and Invasion and a Poor

- 497 Prognostic Marker in Colorectal Cancer. *Clin Cancer Res* **22**, 230-242 (2016).
- 498 37. Porazinski, S. *et al.* EphA2 Drives the Segregation of Ras-Transformed Epithelial Cells from  
499 Normal Neighbors. *Curr Biol* **26**, 3220-3229 (2016).
- 500 38. Awakura, Y. *et al.* Microarray-based identification of CUB-domain containing protein 1 as a  
501 potential prognostic marker in conventional renal cell carcinoma. *J Cancer Res Clin Oncol* **134**,  
502 1363-1369 (2008).
- 503 39. Yu, H., Pardoll, D. & Jove, R. STATs in cancer inflammation and immunity: a leading role for  
504 STAT3. *Nat Rev Cancer* **9**, 798-809 (2009).
- 505 40. Leung, C.T. & Brugge, J.S. Outgrowth of single oncogene-expressing cells from suppressive  
506 epithelial environments. *Nature* **482**, 410-413 (2012).
- 507 41. Sohail, A. *et al.* Characterization of the dimerization interface of membrane type 4 (MT4)-  
508 matrix metalloproteinase. *J Biol Chem* **286**, 33178-33189 (2011).
- 509 42. Yan, X. *et al.* MT4-MMP promotes invadopodia formation and cell motility in FaDu head and  
510 neck cancer cells. *Biochem Biophys Res Commun* **522**, 1009-1014 (2020).
- 511 43. Yip, C., Foidart, P., Noel, A. & Sounni, N.E. MT4-MMP: The GPI-Anchored Membrane-Type  
512 Matrix Metalloprotease with Multiple Functions in Diseases. *Int J Mol Sci* **20** (2019).
- 513 44. Paye, A. *et al.* EGFR activation and signaling in cancer cells are enhanced by the membrane-  
514 bound metalloprotease MT4-MMP. *Cancer Res* **74**, 6758-6770 (2014).
- 515 45. Akagi, T., Sasai, K. & Hanafusa, H. Refractory nature of normal human diploid fibroblasts  
516 with respect to oncogene-mediated transformation. *Proc Natl Acad Sci U S A* **100**, 13567-  
517 13572 (2003).
- 518

Figure 1

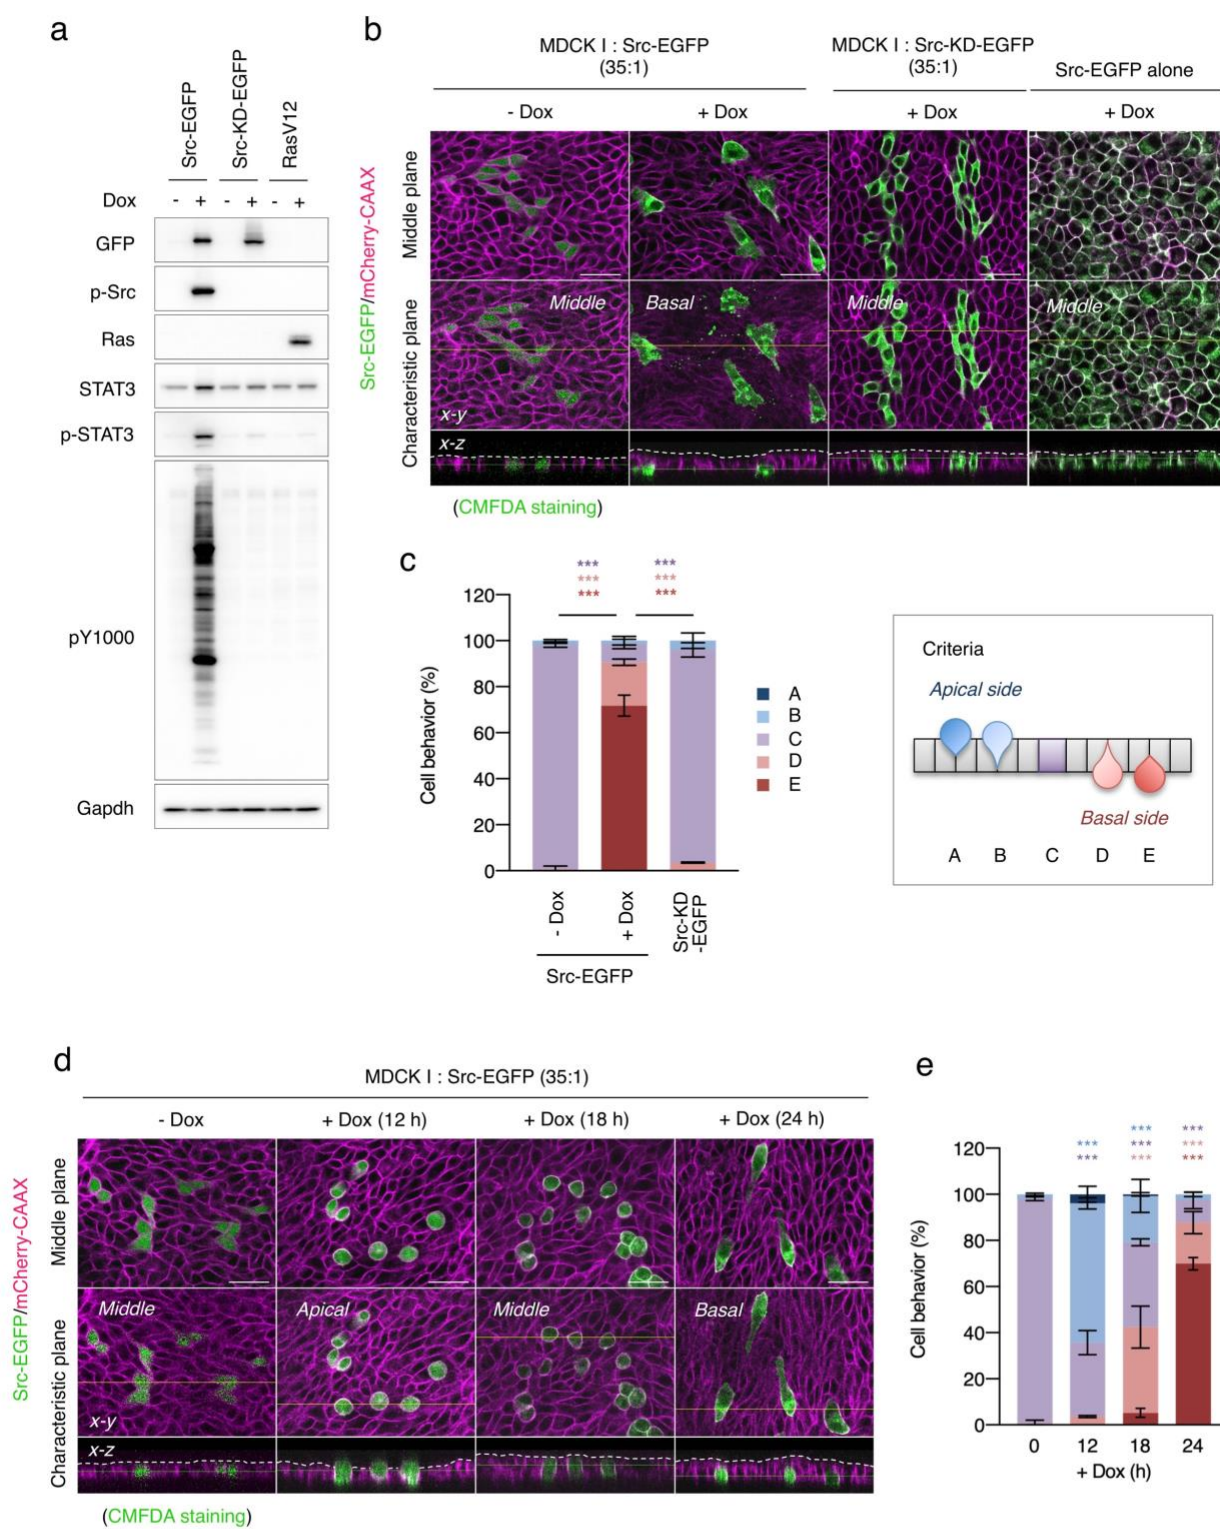

520 **Figure 1. Src-transformed cells delaminate into the basal side of epithelial cell layer**

521 (a) MDCK type I cells harbouring inducible expression system of Src-EGFP, Src-K297M-EGFP or RasV12  
522 were grown in the presence or absence of 1 µg/ml doxycycline (Dox) for 24 h. Cell lysates were subjected to  
523 immunoblotting analysis using the indicated antibodies. (b, c) Type I cells harbouring Src-EGFP or Src-KD-  
524 EGFP were mixed with wild-type cells at a ratio of 35:1 and grown on collagen matrix in the presence or absence  
525 of 1 µg/ml Dox for 24 h. mCherry-CAAX is used as a cell membrane marker, and CMFDA is used as a  
526 fluorescein indicator of Src-EGFP harbouring cells in the absence of Dox. Cell behaviour was monitored (n >  
527 100) and assessed by using criteria (c, right panel); A, apical extruded cell; B, apical extruding cell; C, staying  
528 cell; D, basal delaminating cell; E, basal delaminated cell. (d, e) Type I cells harbouring Src-EGFP were mixed  
529 with wild-type cells at a ratio of 35:1 and grown in the presence or absence of 1 µg/ml Dox for the indicated  
530 time periods. The mean ratios ± SDs were obtained from three independent experiments. \*\*\*,  $P < 0.001$ ; two-  
531 way ANOVA was calculated compared with the Src-EGFP expressed cells (c) or non-treated cells (e). The scale  
532 bars indicate 50 µm.

533

Figure 2

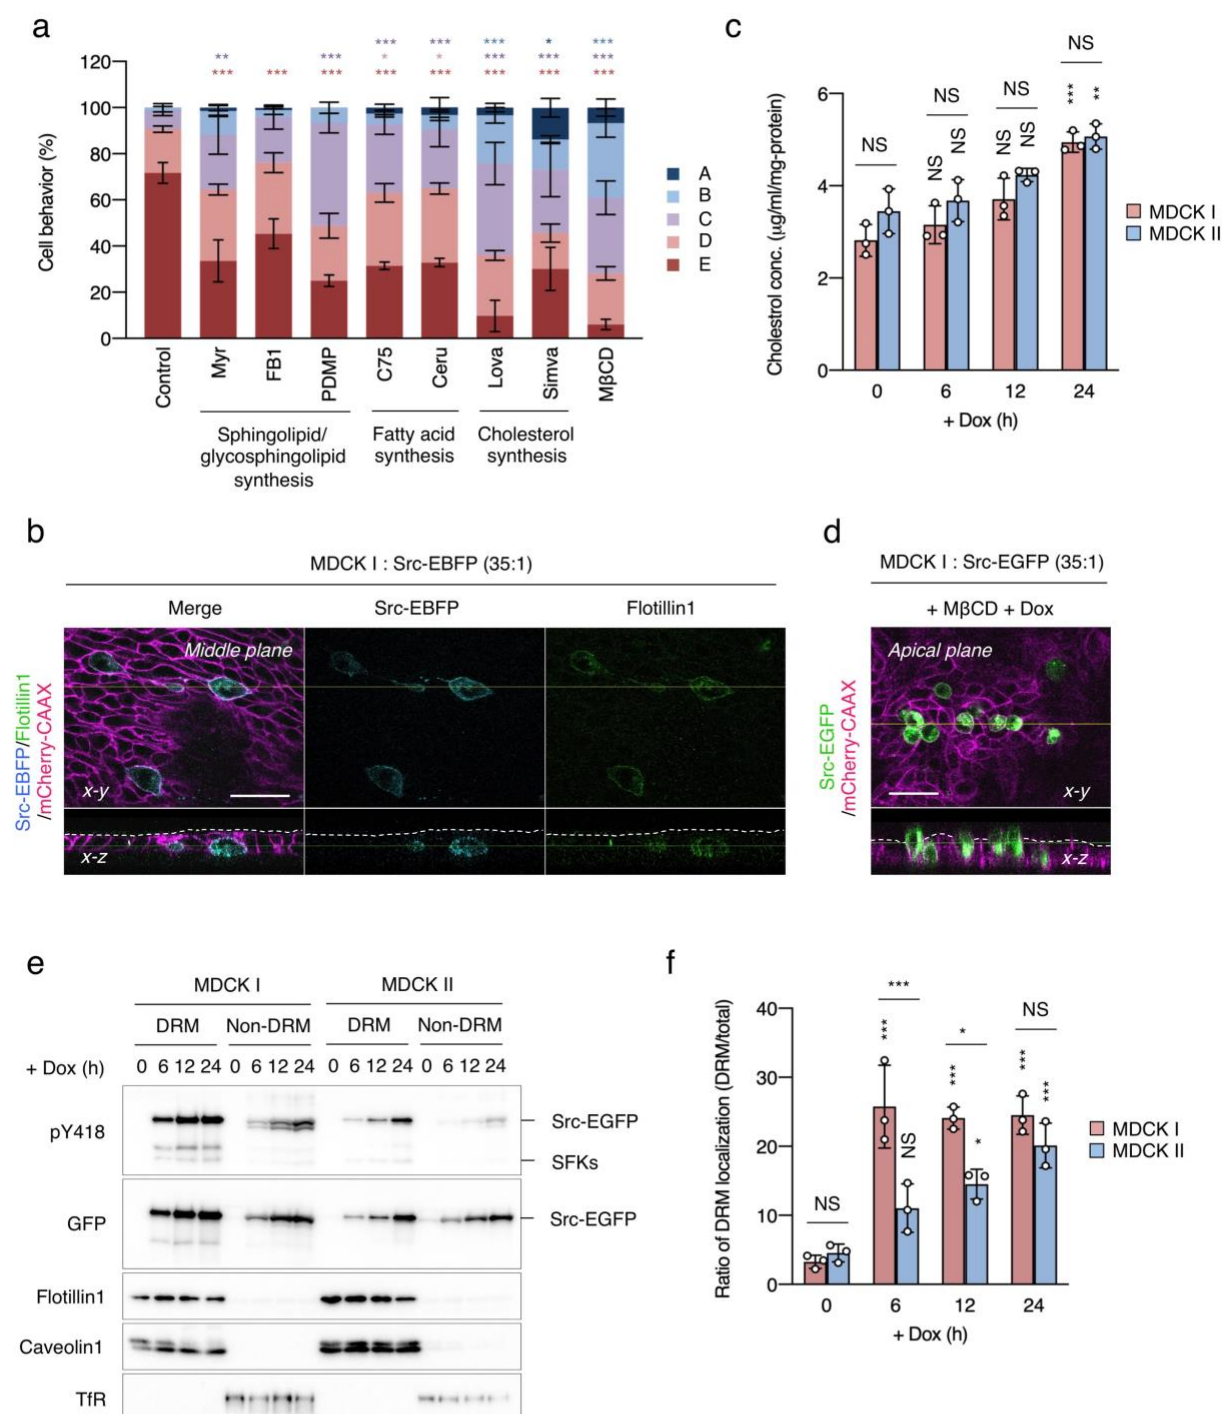



535 **Figure 2. Lipid raft Src localisation is crucial for basal delamination**

536 (a) MDCK type I cells harbouring Src-EGFP were mixed with wild-type cells at a ratio of 35:1 and preincubated  
537 with 200 nM myriocin (Myr), 200 nM fumonisin b1 (FB1), 400 nM D-threo-PDMP (PDMP), 400 nM C75, 400  
538 nM cerulenin (Ceru), 400 nM lovastatin (Lova), 1.6  $\mu$ M simvastatin (Simva), or 500 nM M $\beta$ CD for 2 h and  
539 then incubated with Dox for 24 h. Cell behaviour was assessed by using the criteria (Fig. 1c). (b) Type I cells  
540 harbouring Src-EBFP were mixed with wild-type cells at a ratio of 35:1 and grown in the presence of Dox for  
541 24 h. After fixation, flotillin1 was visualized with specific antibody and Alexa488-conjugated secondary  
542 antibody. (c) Type I and II harbouring Src-EGFP were grown in the presence of Dox for indicated time periods.  
543 Lysates from these cells were subjected to the DRM separation experiment to separate DRM (lipid raft) and  
544 non-DRM (non-lipid raft) fractions. The DRM fractions were subjected to cholesterol assay. (d) Type I cells  
545 harbouring Src-EGFP were mixed with wild-type cells at a ratio of 35:1 and preincubated with 500 nM M $\beta$ CD  
546 for 2 h and then incubated with Dox for 24 h. (e, f) Type I and II harbouring Src-EGFP were grown in the  
547 presence of Dox for indicated time periods. Lysates from these cells were subjected to the DRM separation  
548 experiment to separate DRM and non-DRM fractions. The fractions were analysed by immunoblotting using  
549 indicated antibodies. Flotillin1 and caveolin1 were used as DRM marker, and transferrin receptor (TfR) was  
550 used as a non-DRM marker. Ratio of DRM localisation of Src-EGFP was calculated by DRM fraction / total  
551 amount. The mean ratios  $\pm$  SDs were obtained from three independent experiments. \*,  $P < 0.05$ ; \*\*,  $P < 0.01$ ;  
552 \*\*\*,  $P < 0.001$ ; NS, not significantly different; two-way ANOVA was calculated compared with the Dox-treated  
553 cells (a) or non-treated cells (c, f). The scale bars indicate 50  $\mu$ m.

554



Figure 3

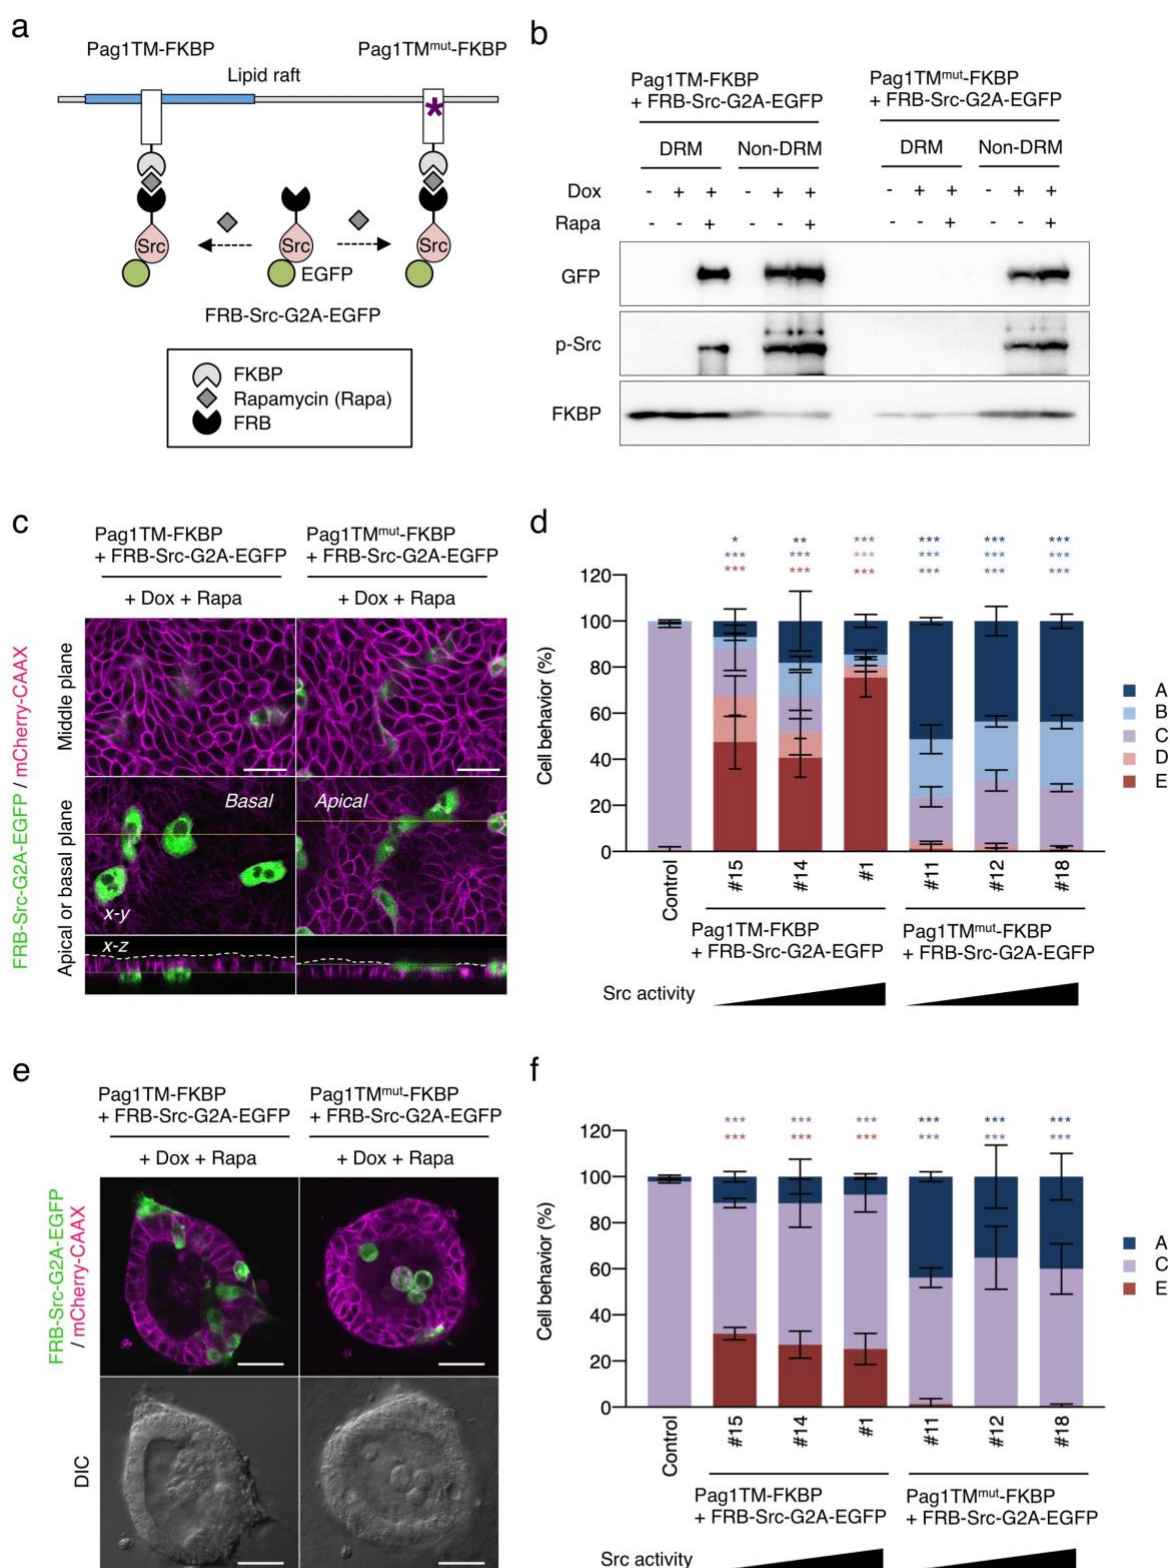

556 **Figure 3. Lipid raft localisation of Src is a critical determinant for basal delamination**

557 (a) Schematic model of Src recruiting system using rapamycin-mediated FKBP-FRB dimerization. An asterisk  
558 indicates point mutations of palmytoilation sites. (b) MDCK type I cells harbouring FRB-Src-G2A-EGFP and  
559 Pag1<sup>TM</sup>-FKBP or Pag1<sup>TM<sup>mut</sup></sup>-FKBP were incubated in the presence or absence of 1 µg/ml Dox and 100 nM  
560 rapamycin (Rapa) for 24 h. Lysates from these cells were subjected to the DRM separation experiment to  
561 separate DRM and non-DRM fractions. The fractions were analysed by immunoblotting using indicated  
562 antibodies. (c, d) Type I were mixed with wild-type cells at a ratio of 35:1 and incubated in the presence of Dox  
563 and Rapa for 24 h. Cell behaviour was assessed by using the criteria (Fig. 1c). (e, f) Type I cells harbouring  
564 FRB-Src-G2A-EGFP and Pag1<sup>TM</sup>-FKBP or Pag1<sup>TM<sup>mut</sup></sup>-FKBP were mixed with wild-type cells at a ratio of  
565 8:1, the mosaic cysts were grown in collagen matrix in the presence of Dox and Rapa for 2 days. Cell behaviour  
566 was assessed by three categories. The mean ratios ± SDs were obtained from three independent experiments. \*,  
567  $P < 0.05$ ; \*\*,  $P < 0.01$ ; \*\*\*,  $P < 0.001$ ; two-way ANOVA was calculated compared with the non-treated cells.  
568 The scale bars indicate 50 µm.

569

Figure 4

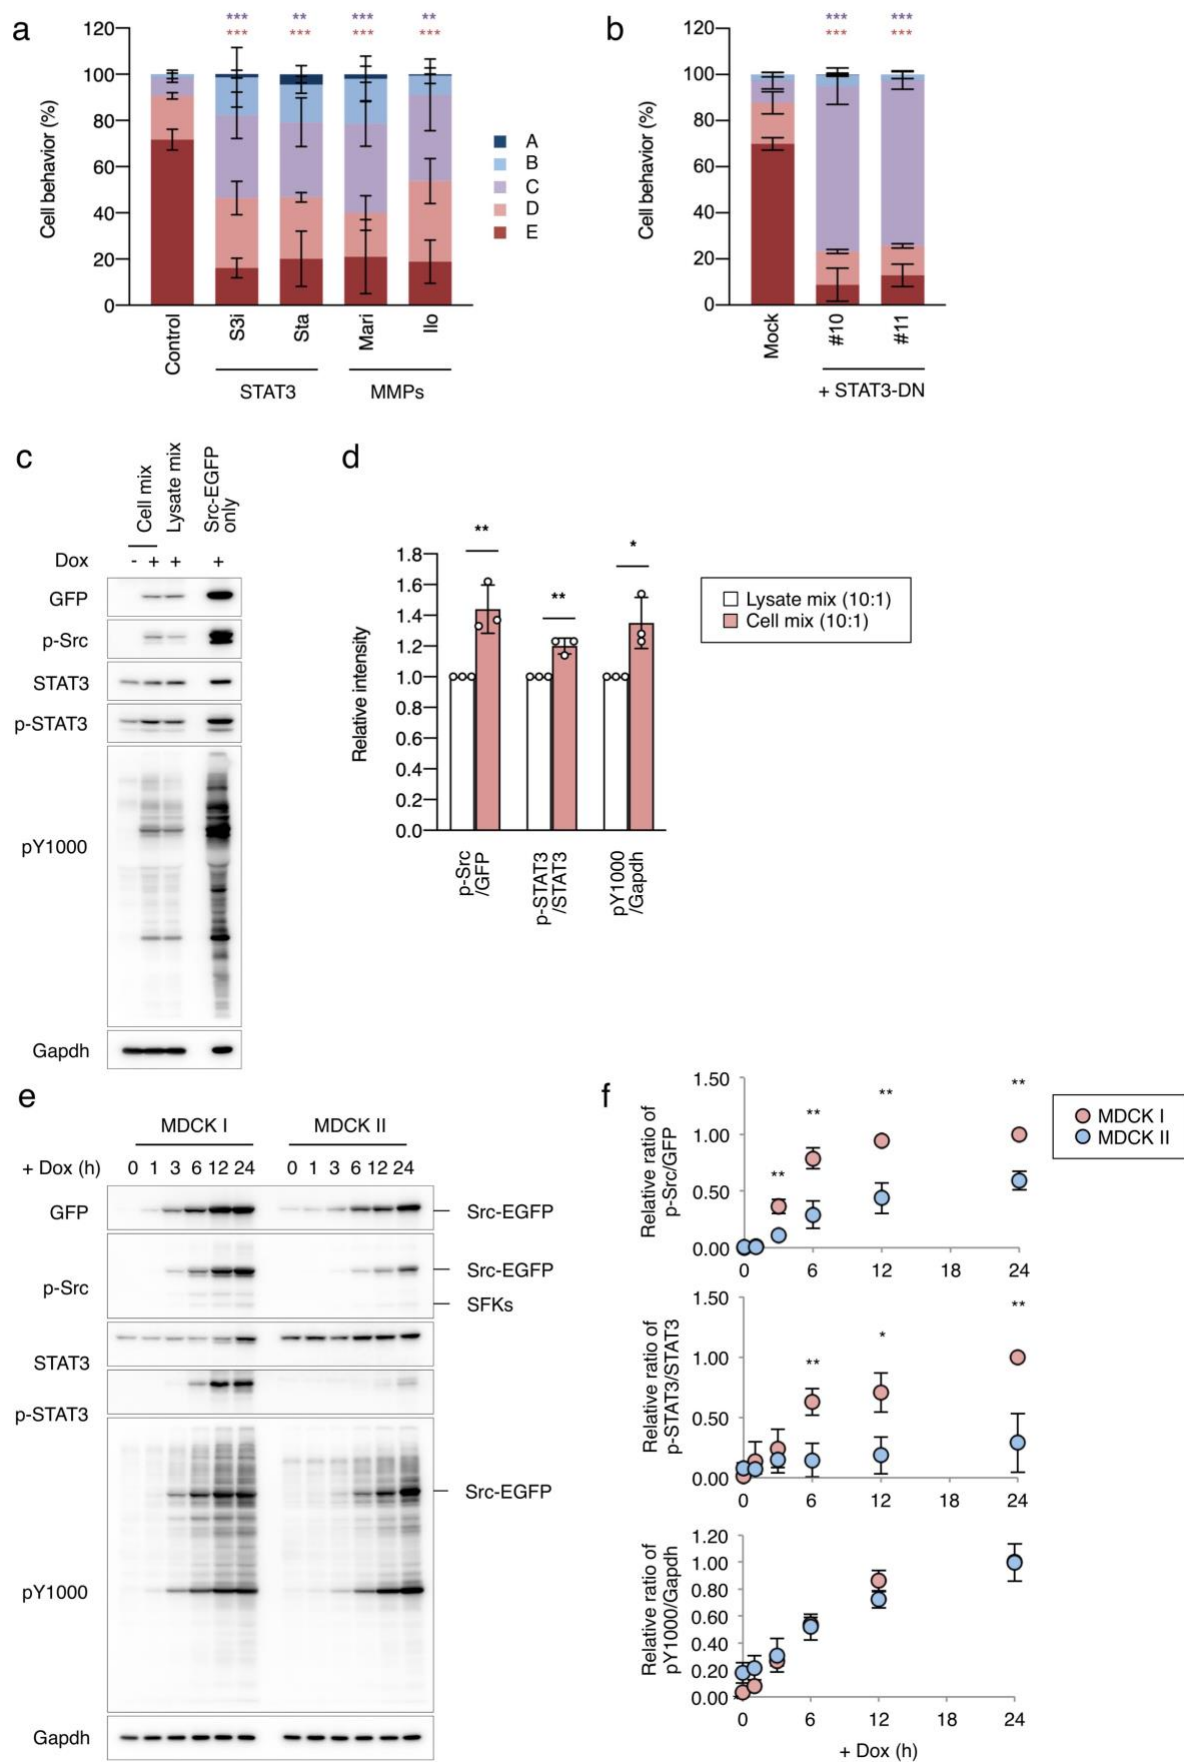

571 **Figure 4. Src induces basal delamination through activation of the STAT3-MMP axis**

572 (a) MDCK type I cells harbouring Src-EGFP were mixed with wild-type cells at a ratio of 35:1 and preincubated  
573 with the 100  $\mu$ M S3i-201 (S3i), 20  $\mu$ M static (Sta), 20  $\mu$ M marimastat (Mari), or 400 nM ilomastat (Ilo) for 2  
574 h and then incubated with Dox for 24 h. (b) Two type I clones harbouring Src-EGFP and STAT3-Y705F (DN)  
575 were mixed with wild-type cells at a ratio of 35:1 and incubated with Dox for 24 h. Cell behaviour was assessed  
576 by using the criteria (Fig. 1c). (c, d) Type I cells harbouring Src-EGFP were mixed with wild-type cells at a  
577 ratio of 10:1 and incubated with Dox for 24 h. Wild-type and Src-EGFP harbouring cells were separately  
578 incubated with Dox for 24 h, and cell lysates were mix at a ratio of 10:1. These cell lysates were subjected to  
579 immunoblotting analysis using the indicated antibodies. Relative intensity of p-Src (pY418)/GFP, p-STAT3  
580 (pY705)/STAT3, and pY1000/Gapdh were calculated by setting the value for lysate mix to one. (e, f) Type I and  
581 II harbouring Src-EGFP were incubated in the presence of Dox for indicated time periods. Lysate from these  
582 cells were analysed by immunoblotting using indicated antibodies. Relative ratio of p-Src/GFP, p-  
583 STAT3/STAT3, and pY1000/Gapdh were calculated by setting the value for 24 h-treated type I cells to one. The  
584 mean ratios  $\pm$  SDs were obtained from three independent experiments. \*,  $P < 0.05$ ; \*\*,  $P < 0.01$ ; \*\*\*,  $P < 0.001$ ;  
585 two-way ANOVA was calculated compared with the Dox-treated cells (a) or mock-transfected cells (b), and  
586 two-tailed  $t$ -test was calculated (d, f).

587

Figure 5

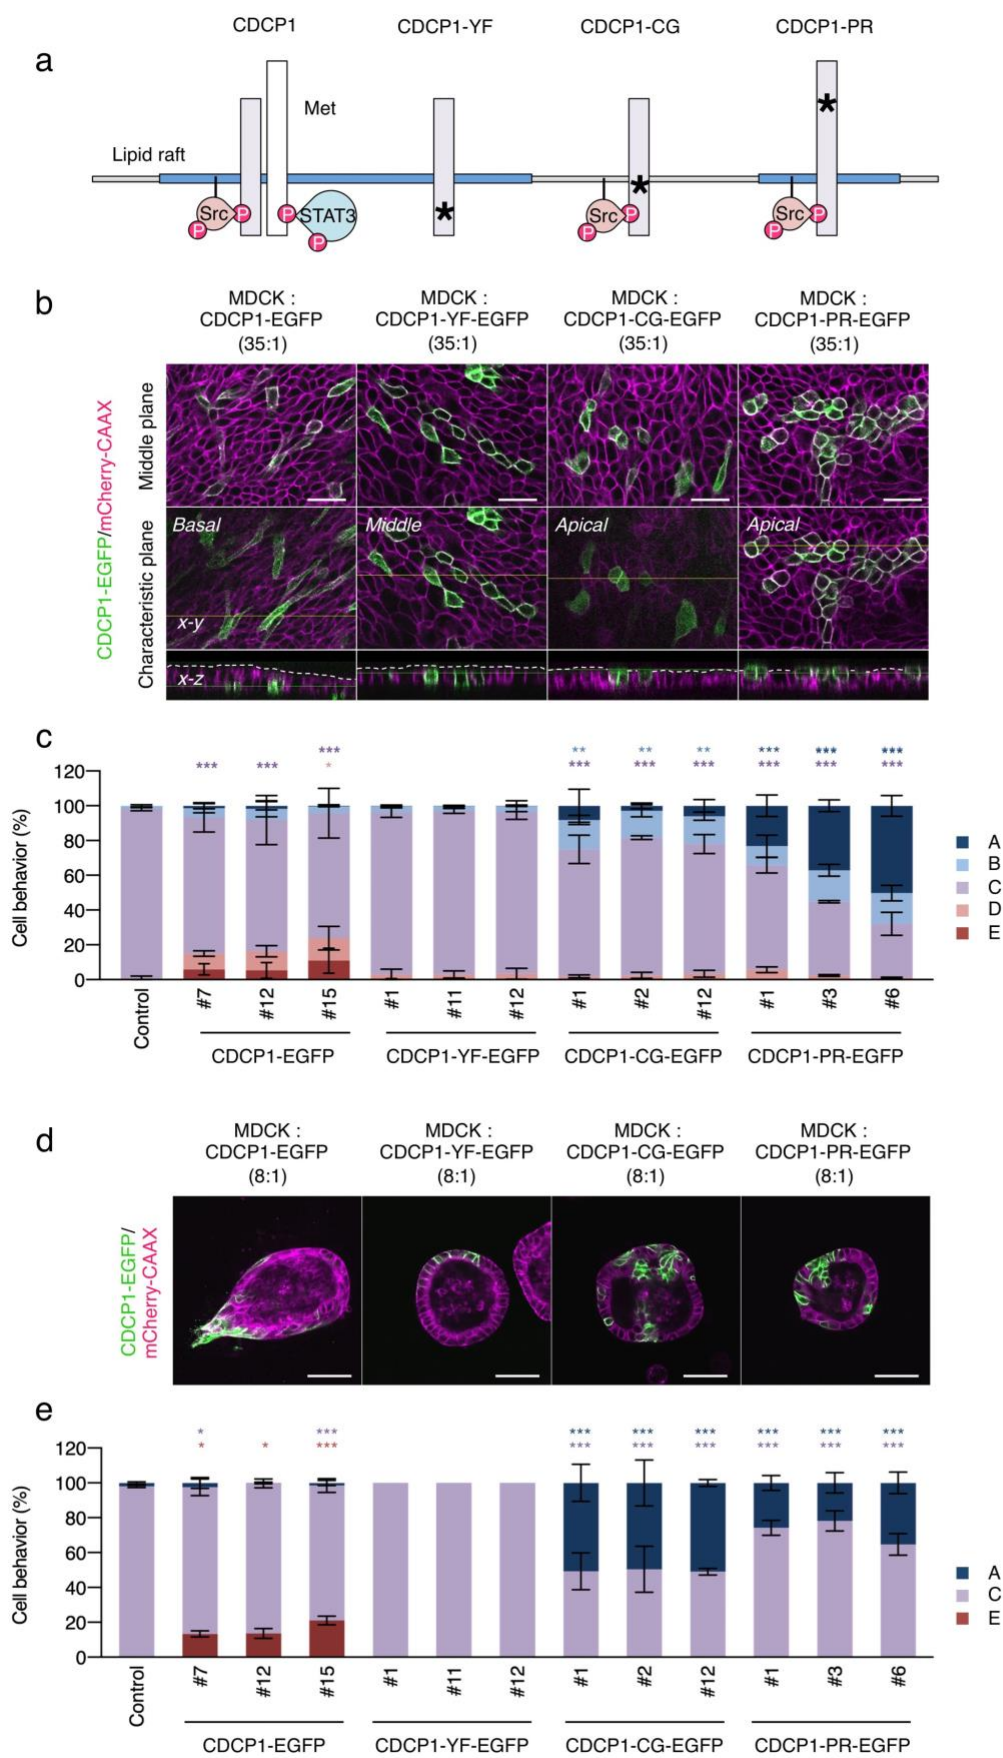

589 **Figure 5. CDCP1 induces basal delamination through Src activation within lipid rafts**

590 (a) Schematic model of CDCP1 and its mutants. Blue squares indicate lipid raft domains, and asterisks indicate  
591 point mutations. (b, c) MDCK type I cells harbouring CDCP1-EGFP, CDCP1-YF-EGFP, CDCP1-CG-EGFP,  
592 or CDCP1-PR-EGFP were mixed with wild-type cells at a ratio of 35:1 and incubated with Dox for 24 h. Cell  
593 behaviour was assessed by using the criteria (Fig. 1c). (d, e) Type I cells harbouring CDCP1-EGFP, CDCP1-  
594 YF-EGFP, CDCP1-CG-EGFP or CDCP1-PR-EGFP were mixed with wild-type cells at a ratio of 8:1, the mosaic  
595 cysts were grown in collagen matrix in the presence of Dox for 2 days. Cell behaviour was assessed by three  
596 categories. The mean ratios  $\pm$  SDs were obtained from three independent experiments. \*,  $P < 0.05$ ; \*\*,  $P < 0.01$ ;  
597 \*\*\*,  $P < 0.001$ ; two-way ANOVA was calculated compared to the control cells (c) or mosaic cysts (e). The scale  
598 bars indicate 50  $\mu\text{m}$ .

599



Figure 6

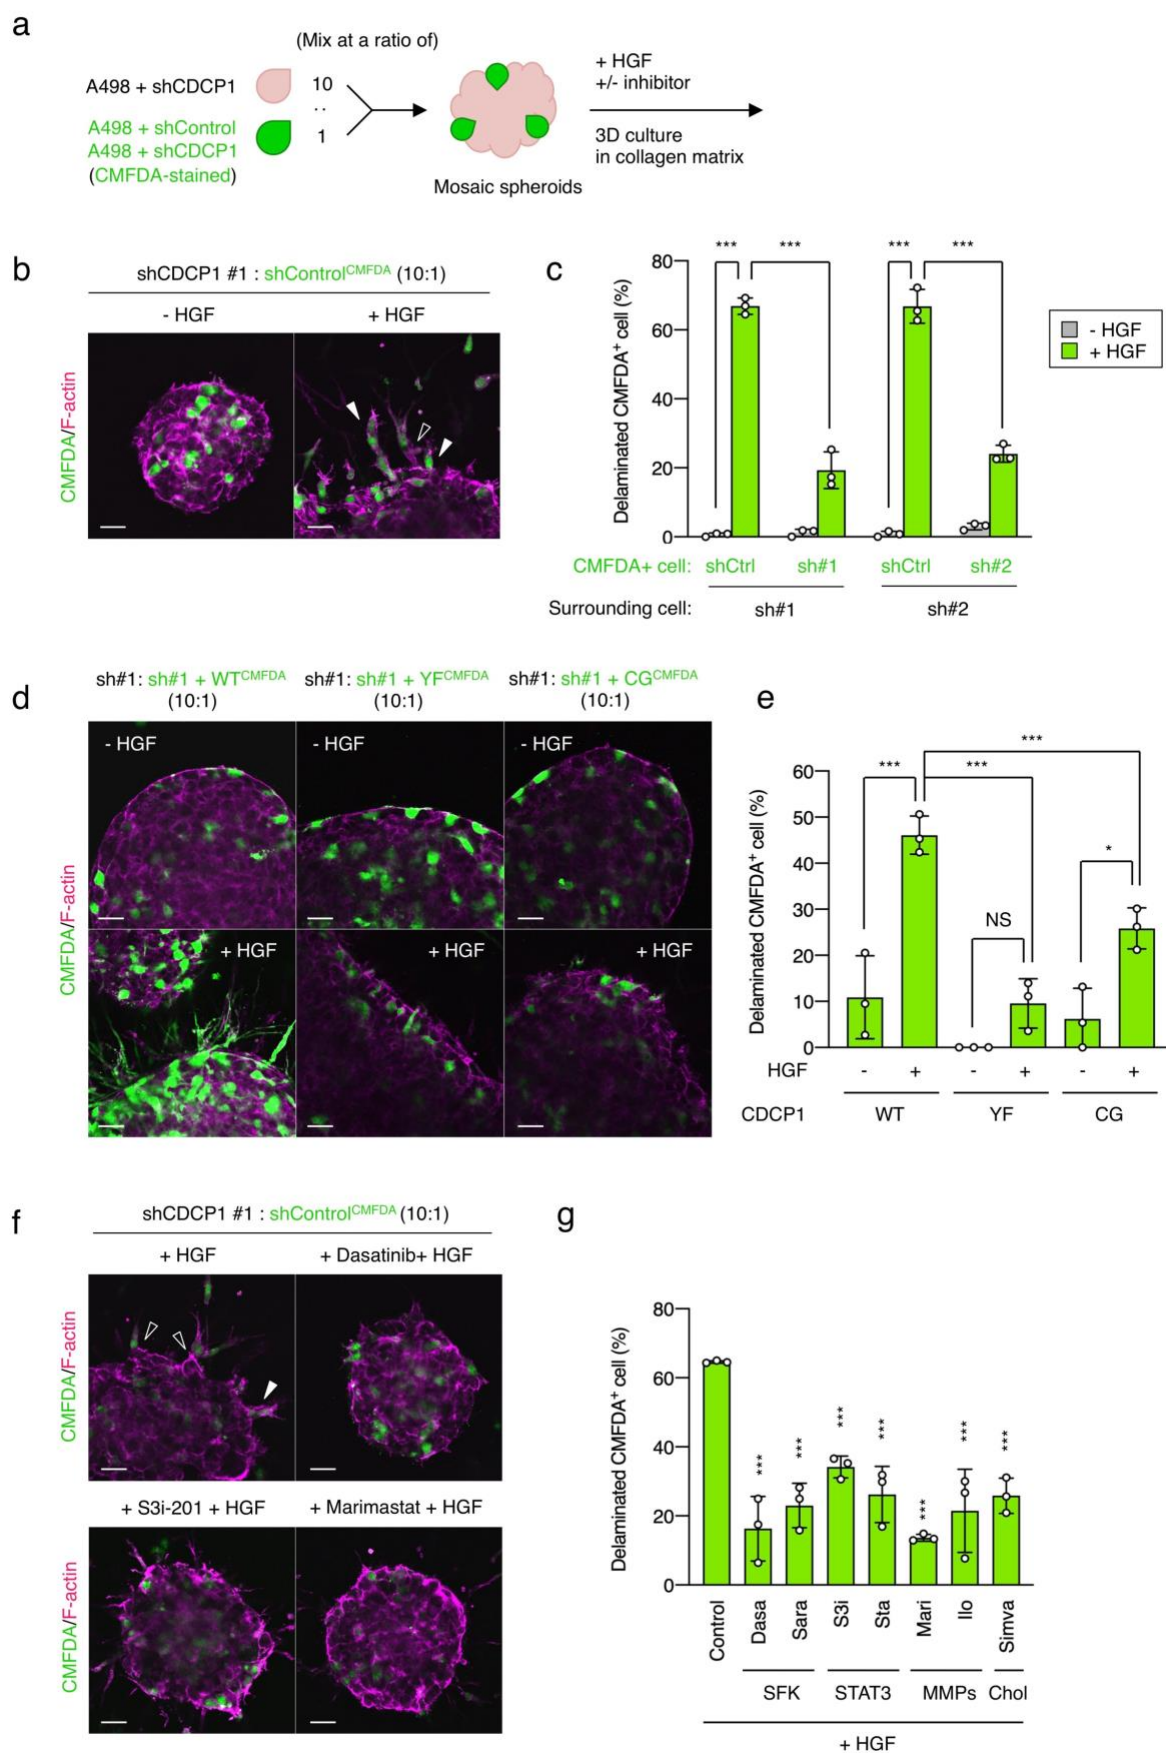

601 **Figure 6. CDCP1-expressing cancer cells lead collective invasion with low-invasive cells**

602 (a) Schematic diagram of mosaic spheroid analysis of A498 cells. shControl or shCDCP1 expressing A498 cells  
603 were stained using CMFDA and mixed with non-stained shCDCP1 expressing A498 cells at a ratio of 1:10, and  
604 the mosaic spheroids were embedded within collagen matrix and grown in the presence of HGF and/or inhibitors.  
605 (b, c) A498 mosaic spheroids embedded within collagen matrix were incubated in the presence or absence of  
606 100 ng/ml HGF for 2 days. After fixation, filamentous actin was stained with Alexa594-conjugated phalloidin.  
607 Percentage of delaminated CMFDA-stained A498 cells was calculated by delaminated cell / total peripherally  
608 localised cells ( $n > 60$ ). The mean ratios  $\pm$  SDs were obtained from three independent experiments. (d, e) A498-  
609 shCDCP1 cells harbouring CDCP1, CDCP1-YF, or CDCP1-CG were stained using CMFDA and mixed with  
610 non-stained A498-shCDCP1 cells at a ratio of 1:10, and the mosaic spheroids were embedded within collagen  
611 matrix and grown in the presence of HGF. The mean ratios  $\pm$  SDs were obtained from three independent  
612 experiments. (f, g) A498 mosaic spheroids were pretreated with 10 nM dasatinib (Dasa), 20  $\mu$ M saracatinib  
613 (Sara), 100  $\mu$ M S3i-201 (S3i), 20  $\mu$ M stattic (Sta), 20  $\mu$ M marimastat (Mari), 400 nM ilomastat (Ilo) or 1.6  $\mu$ M  
614 simvastatin (Simva) for 2 h and incubated in the presence of 100 ng/ml HGF for 2 days. The mean ratios  $\pm$  SDs  
615 were obtained from three independent experiments. \*,  $P < 0.05$ ; \*\*\*,  $P < 0.001$ ; NS, not significantly different;  
616 ANOVA was calculated compared to the HGF-treated mosaic spheroids. The scale bars indicate 50  $\mu$ m.

617
